# Supplementary figures and images for: Ex Vivo and In Vivo Noninvasive Imaging of Epidermal Growth Factor Receptor Inhibition on Colon Tumorigenesis Using Activatable Near-Infrared Fluorescent Probes
Source: PubMed Central journal article supplement — Mol Imaging. 2017 Sep 8;16:1536012117729044. doi: 10.1177/1536012117729044 (PMC5595252; doi:10.1177/1536012117729044), 2017-09-08

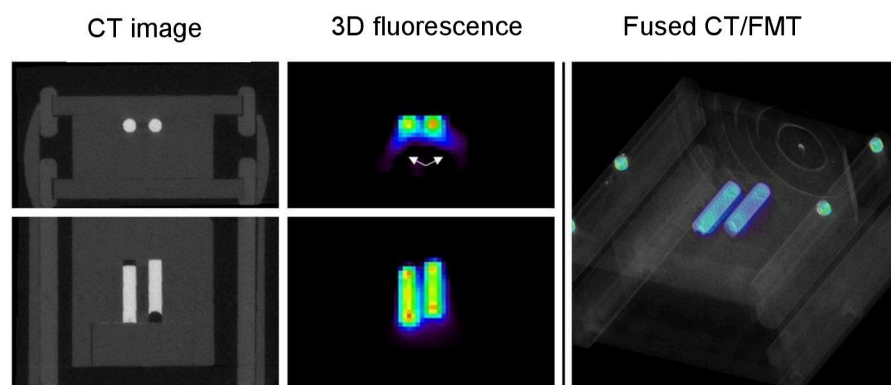

Supplementary Figure 1

Supplement: Supp_fig_1.pdf [file Supp_fig_1.pdf]
